# Supplementary material for: Synthesis and Biological Characterization of the New Glycolipid Lactose Undecylenate (URB1418)
Source: MDPI journal article supplement (doi:10.3390/ph15040456), 2022-04-08
Supplement: s1 [file s1]

## Supplementary material

### Synthesis and Biological Characterization of the New Glycolipid Lactose Undecylenate (URB1418)

Michele Verboni, Serena Benedetti, Raffaella Campana, Francesco Palma, Lucia Potenza,

Maurizio Sisti, Andrea Duranti\* and Simone Lucarini

<sup>a</sup>Department of Biomolecular Sciences, University of Urbino Carlo Bo, 61029, Urbino (PU), Italy.

\* Corresponding authors.

*E-mail address:* [andrea.duranti@uniurb.it](mailto:andrea.duranti@uniurb.it) (A. Duranti)

#### Table of Contents

|    |                                                                                                                                                                                                                          |    |
|----|--------------------------------------------------------------------------------------------------------------------------------------------------------------------------------------------------------------------------|----|
| 1. | Graphical Representation of <sup>1</sup> H NMR, <sup>1</sup> H- <sup>1</sup> H COSY NMR, <sup>13</sup> C NMR and MS(ESI) Spectra of Compounds <b>3</b> [Lactose Tetra Acetate (LTA) Undecylenate] and <b>4</b> (URB1418) | S2 |
| 2. | Water Solubility Data of URB1418                                                                                                                                                                                         | S7 |

**Figure S1.**  $^1\text{H}$  NMR Spectra of LTA Undecylenate.

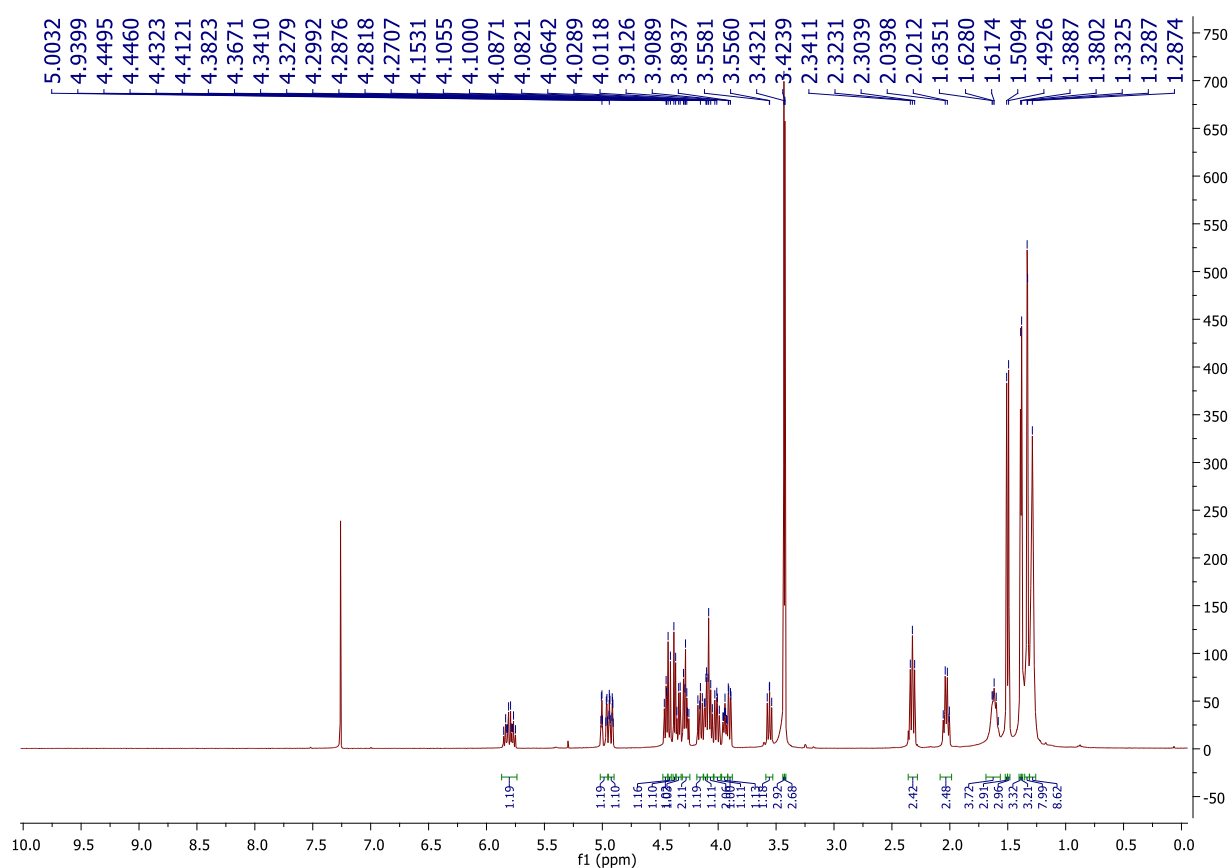

**Figure S2.**  $^1\text{H}$ - $^1\text{H}$  COSY NMR Spectra of LTA Undecylenate.

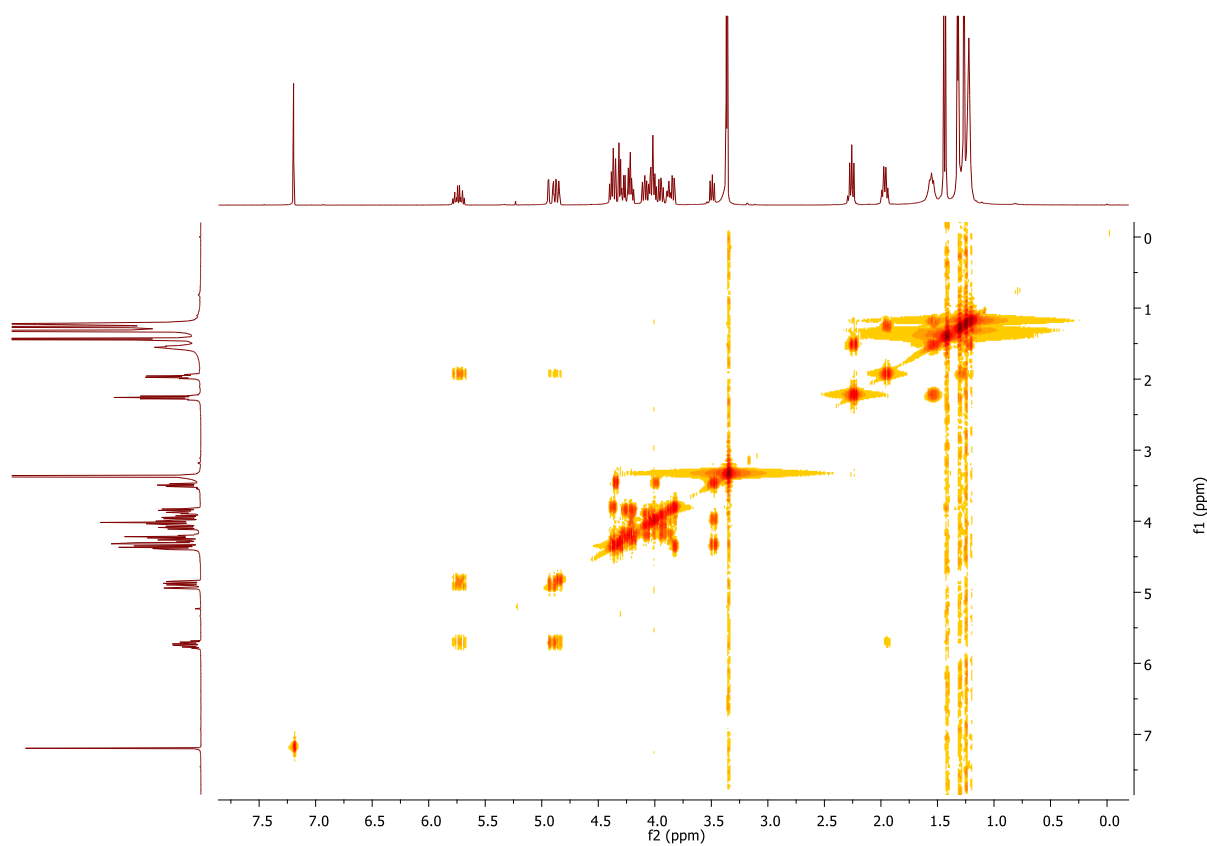

**Figure S3.**  $^{13}\text{C}$  NMR Spectra of LTA Undecylenate.

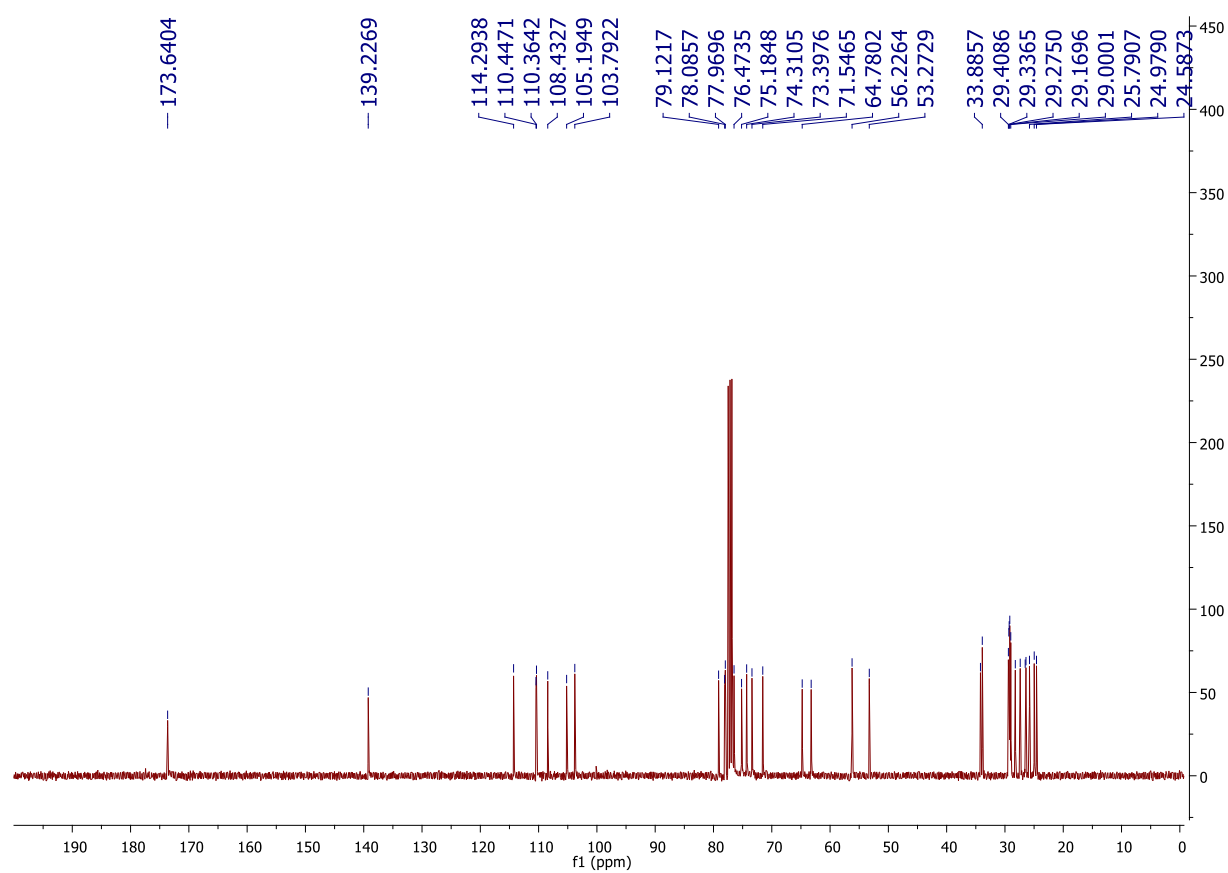

**Figure S4.** MS(ESI) Spectra of LTA Undecylenate.

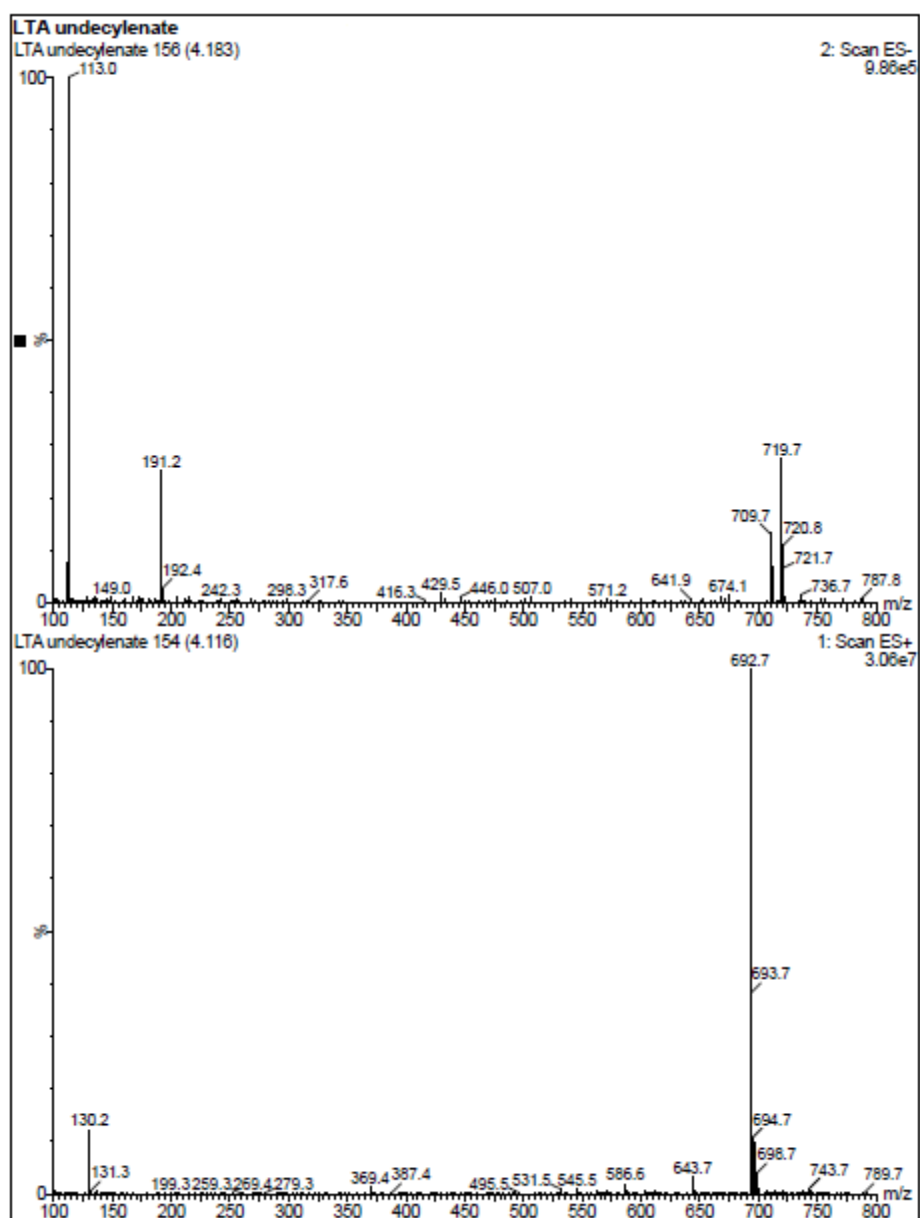

**Figure S5.**  $^1\text{H}$  NMR Spectra of URB1418.

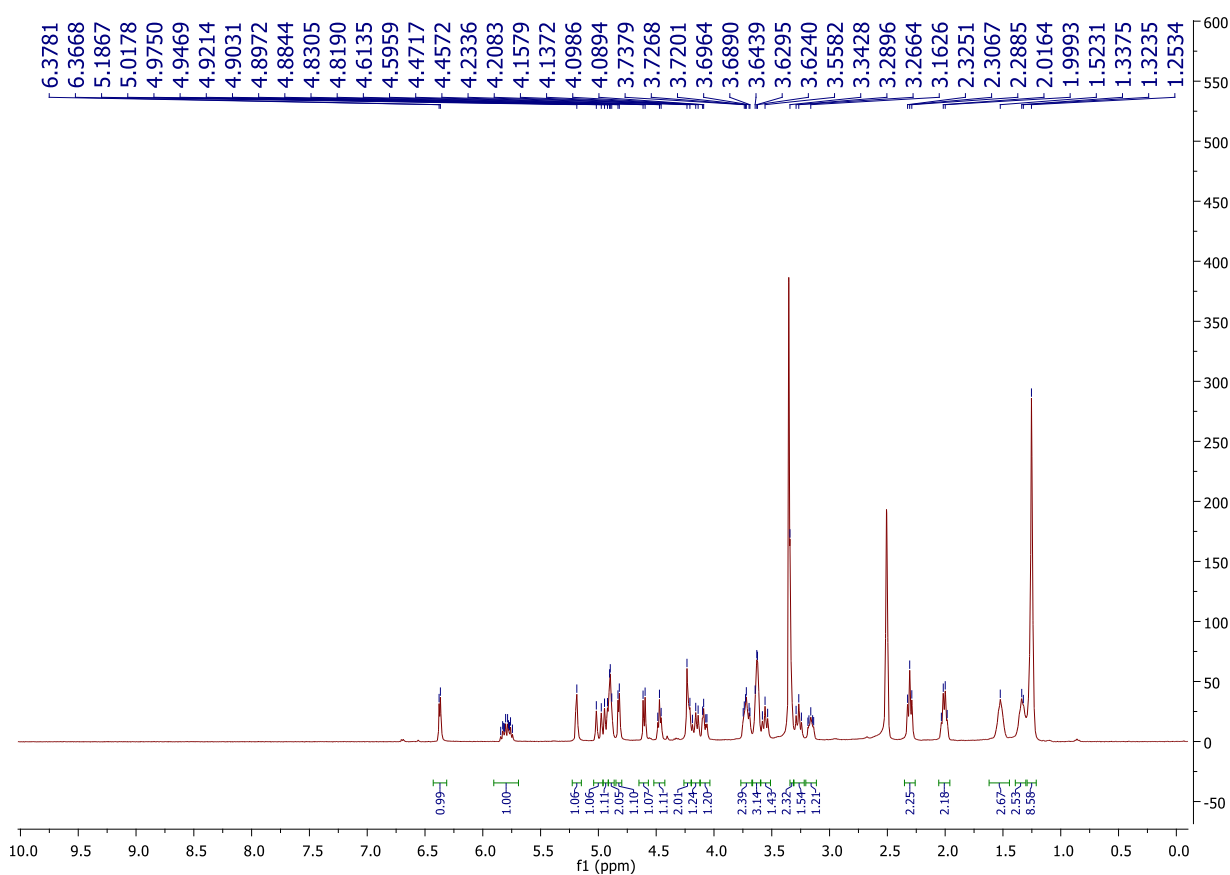

**Figure S6.**  $^1\text{H}$ - $^1\text{H}$  COSY NMR Spectra of URB1418.

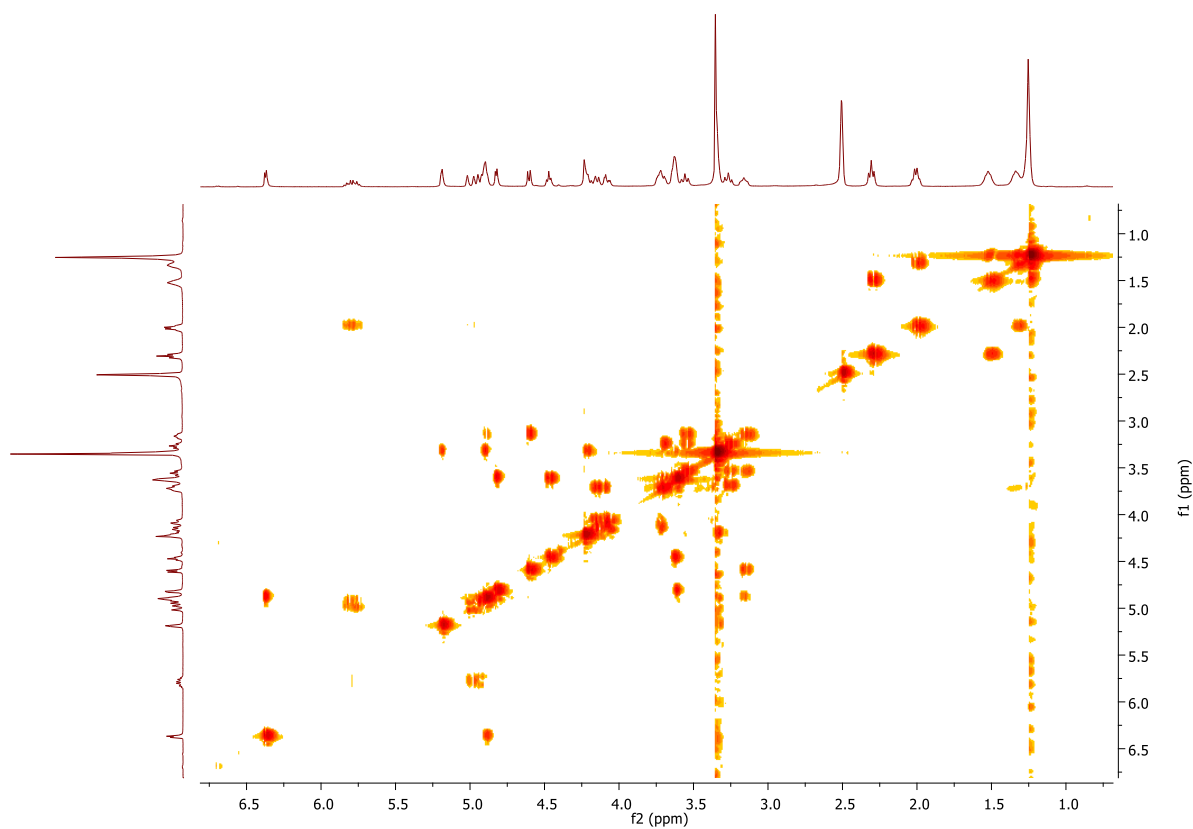

**Figure S7.**  $^{13}\text{C}$  NMR Spectra of URB1418.

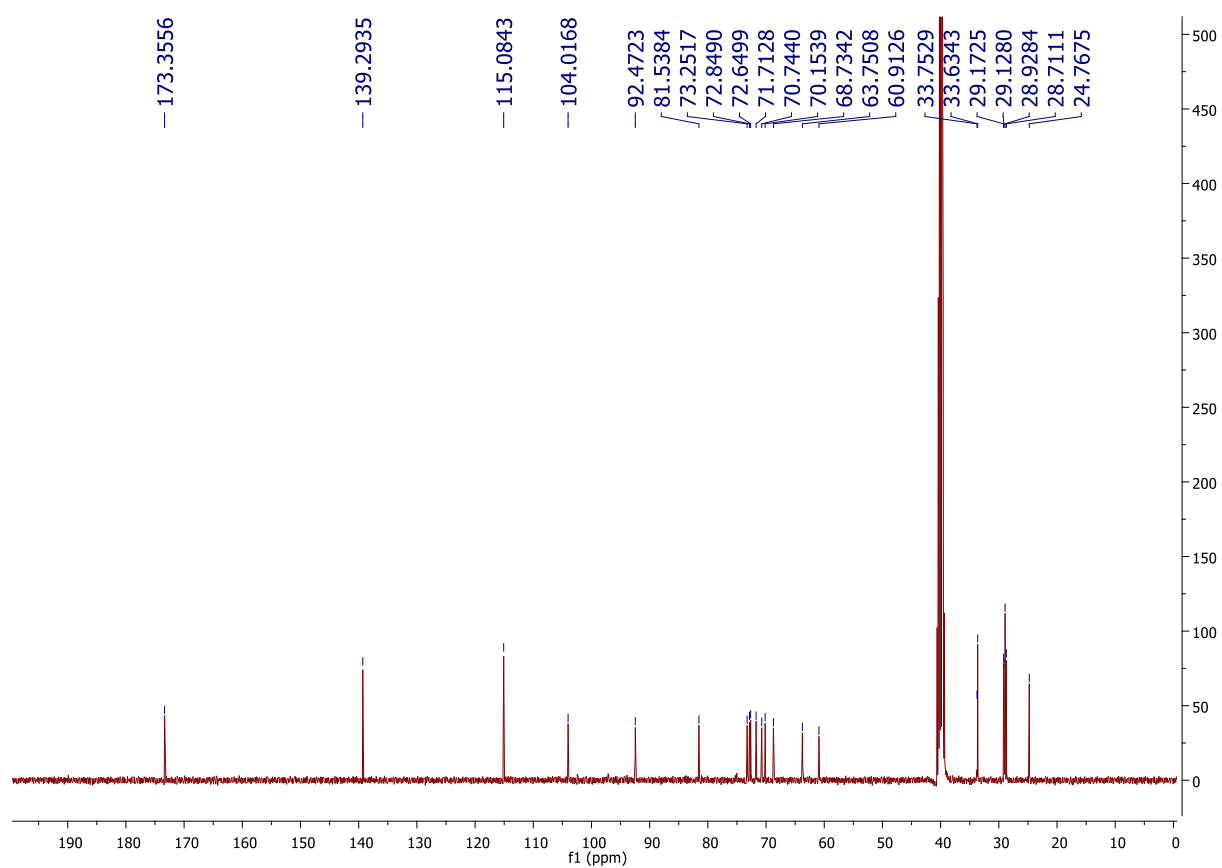

**Figure S8.** MS(ESI) Spectra of URB1418.

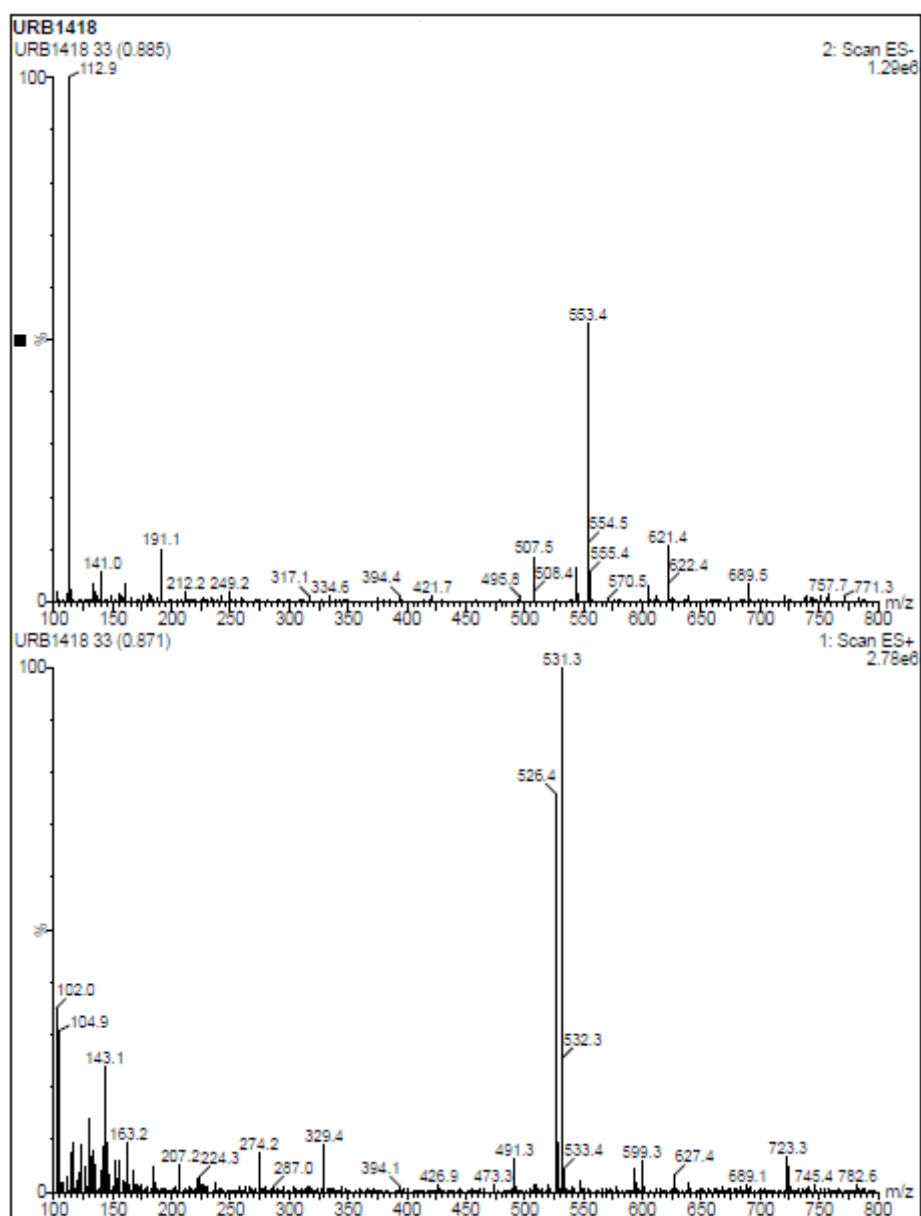

**Table S1.** Water Solubility Data of URB1418.

| Water solubility (mg/mL) | % w/v (g/100 mL) | mM (mmol/L) |
|--------------------------|------------------|-------------|
| 1.6                      | 0.163            | 3.2         |
